# Supplementary material for: Nickel exchanged supported 12-tungstophosphoric acid: synthesis, characterization and base free one-pot oxidative esterification of aldehyde and alcohol
Source: Royal Society of Chemistry journal article supplement (doi:10.1039/c8ra08419j), 2019-01-01
Supplement: c8ra08419j1.pdf [file c8ra08419j1.pdf]

## Supplementary Information

### Nickel Exchanged Supported 12-tungstophosphoric acid: Synthesis, Characterization and Base free one pot Oxidative Esterification of Aldehyde and Alcohol

*Anish Patel and Anjali Patel \**

Polyoxometalates and Catalysis Laboratory, Department of Chemistry, Faculty of Science.

The Maharaja Sayajirao University of Baroda, Vadodara, India.

\*E-mail: [anjali.patel-chem@msubaroda.ac.in](mailto:anjali.patel-chem@msubaroda.ac.in)

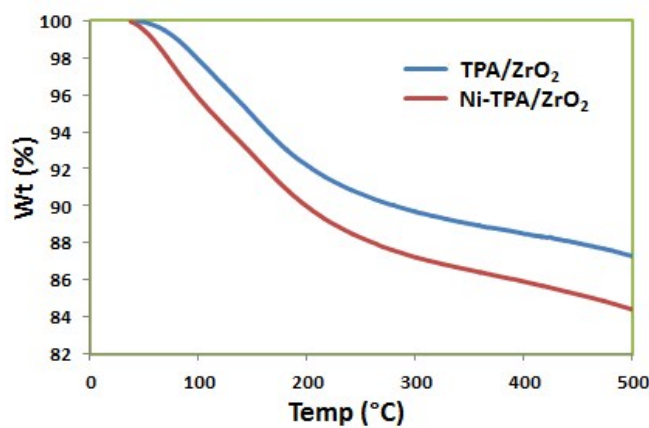

**Figure S1.** TGA Curves

**Table S1.** FT-IR data of (a)  $ZrO_2$ , (b)  $TPA/ZrO_2$  and (c)  $Ni-TPA/ZrO_2$

| Materials      | Wavenumber ( $cm^{-1}$ ) |       |      |     |       |        |      |
|----------------|--------------------------|-------|------|-----|-------|--------|------|
|                | O-H-O                    | H-O-H | P-O  | W=O | W-O-W | Zr-O-H | Ni-O |
| $ZrO_2$        | 1600                     | 137   | -    | -   | -     | 600    | -    |
| $TPA/ZrO_2$    | 1600                     | 1370  | 1070 | 964 | 812   | 600    | -    |
| $Ni-TPA/ZrO_2$ | 1631                     | 1404  | 1059 | 947 | 812   | 600    | 495  |

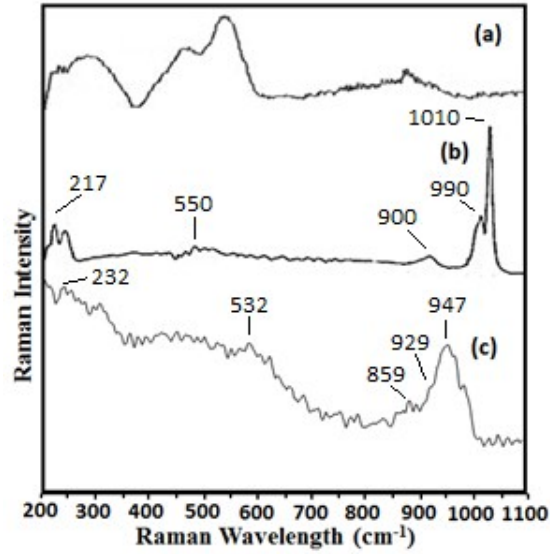

**Figure S2.** Raman data of (a)  $ZrO_2$ , (b)  $TPA/ZrO_2$  and (c)  $Ni-TPA/ZrO_2$

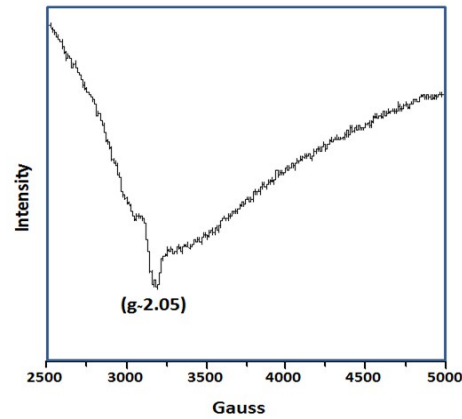

**Figure S3.** ESR spectrum of  $Ni-TPA/ZrO_2$

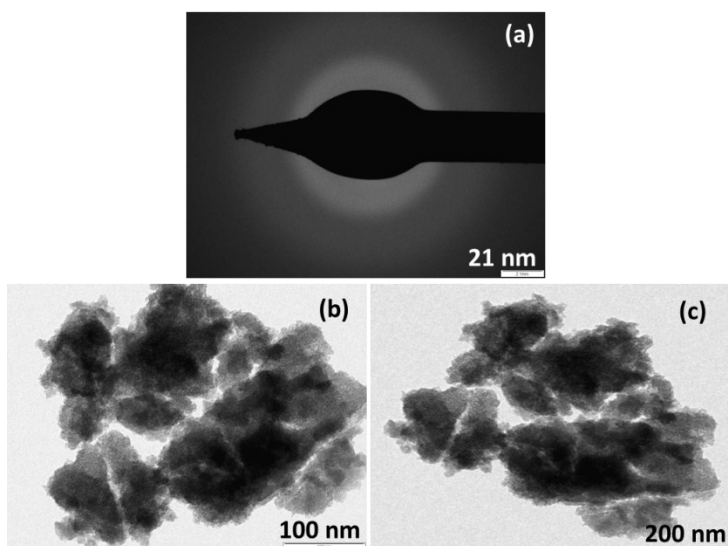

**Figure S4.** TEM images of dispersed Ni-TPA/ZrO<sub>2</sub>

**Table S2.** Effect of nickel concentration

| Catalyst                        | % Conversion | % Selectivity |      |
|---------------------------------|--------------|---------------|------|
|                                 |              | Ester         | Acid |
| (0.03M) Ni-TPA/ZrO <sub>2</sub> | 60           | 64            | 36   |
| *Ni-TPA/ZrO <sub>2</sub>        | 65           | 63            | 37   |
| (0.05M) Ni-TPA/ZrO <sub>2</sub> | 58           | 69            | 31   |

**Reaction conditions:** Benzaldehyde (10 mmol), H<sub>2</sub>O<sub>2</sub> (30 mmol), Methanol (5 mL), Catalyst (10 mg), Time (6 h), Temp. (80 °C). \* Ni-TPA/ZrO<sub>2</sub> = (0.04 M) Ni-TPA/ZrO<sub>2</sub>

**Table S3.** Role of substrate

| Catalyst                              | % Conversion | % Selectivity |      |
|---------------------------------------|--------------|---------------|------|
|                                       |              | Ester         | Acid |
| Without catalyst                      | 3            | -             | 100  |
| Without H <sub>2</sub> O <sub>2</sub> | 11           | -             | 100  |
| Without methanol                      | 42           | -             | 100  |

**Reaction conditions:** Benzaldehyde (10 mmol), H<sub>2</sub>O<sub>2</sub> (30 mmol), Methanol (5 mL), Catalyst (10 mg), Catalyst/Substrate ratio (5.11e-5), Time (6 h), Temp. (80 °C).

**Table S4.** Effect of nickel concentration

| Catalyst                        | % Conversion | % Selectivity |       |      |
|---------------------------------|--------------|---------------|-------|------|
|                                 |              | Benbaldehyde  | Ester | Acid |
| (0.03M) Ni-TPA/ZrO <sub>2</sub> | 42           | 68            | 28    | 4    |
| *Ni-TPA/ZrO <sub>2</sub>        | 43           | 61            | 34    | 5    |
| (0.05M) Ni-TPA/ZrO <sub>2</sub> | 59           | 90            | 8     | 2    |

**Reaction conditions:** Benzyl alcohol (10 mmol), H<sub>2</sub>O<sub>2</sub> (30 mmol), Methanol (7.5 mL), Catalyst (10 mg), Time (24 h), Temp. (80 °C). \*Ni-TPA/ZrO<sub>2</sub> = (0.04 M) Ni-TPA/ZrO<sub>2</sub>

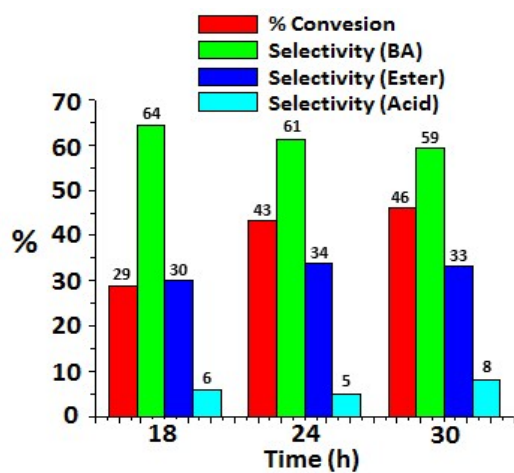

**Figure S5.** Effect of time. Reaction condition: Benzyl alcohol (10 mmol), H<sub>2</sub>O<sub>2</sub> (30 mmol), Methanol (7.5 mL), Catalyst (10 mg), Catalyst/Substrate ratio (5.11e-5), Temp. (80 °C)

**Table S5.** The roll of substrates and catalyst

| Condition                                                            | % Conversion                                                     | % Selectivity |      |
|----------------------------------------------------------------------|------------------------------------------------------------------|---------------|------|
|                                                                      |                                                                  | Benzaldehyde  | Acid |
| Without Catalyst<br>(with methanol + H <sub>2</sub> O <sub>2</sub> ) | -                                                                | -             | -    |
| Without H <sub>2</sub> O <sub>2</sub><br>(with methanol + catalyst)  | 0.2                                                              | 100           | -    |
| Without Methanol                                                     | <sup>a</sup> 1.6<br>(with Ni(CH <sub>3</sub> COO) <sub>2</sub> ) | 100           | -    |
|                                                                      | 12.7<br>(with TPA/ZrO <sub>2</sub> )                             | 100           | -    |
|                                                                      | 23<br>(with Ni-TPA/ZrO <sub>2</sub> )                            | 98            | 2    |

**Reaction conditions:** Benzyl alcohol (10 mmol), H<sub>2</sub>O<sub>2</sub> (30 mmol), Methanol (7.5 mL), Catalyst (10 mg), Catalyst/Substrate ratio (5.11e-5), Time (24 h), Temp. (80 °C). <sup>a</sup>Active amount of nickel (5.11 × 10<sup>-4</sup> mmol).

**Table S6.** Acidity by n-butyl amine volumetric titration and Potentiometric titration

| Catalyst                  | Acidic strength<br>Ei (mV) | Types of acidic sites<br>(meq.g <sup>-1</sup> ) |      | Total no. of acidic sites | Acidic sites<br>mmol of n-butyl amine/g |
|---------------------------|----------------------------|-------------------------------------------------|------|---------------------------|-----------------------------------------|
|                           |                            | Strong                                          | Weak |                           |                                         |
| Ni-TPA/ZrO <sub>2</sub>   | 87                         | 2.3                                             | 1.7  | 4.0                       | 0.86                                    |
| R-Ni-TPA/ZrO <sub>2</sub> | 82                         | 2.1                                             | 1.6  | 3.7                       | 0.82                                    |

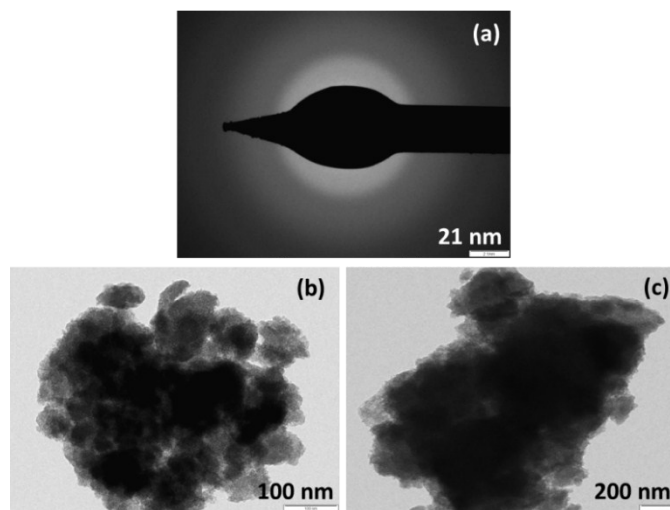**Figure S6** TEM images of regenerated Ni-TPA/ZrO<sub>2</sub>
